# Supplementary material for: Effect of Single – Nanofibrous Materials for Epidural Scar Prevention After Laminectomy – An Experimental Study in an Animal Model
Source: Research Square preprint supplement (doi:10.21203/rs.3.rs-7358417/v1), 2025-09-17
Supplement: Supplementary file 1 [file 4f7c0afd8f4c79214168b013.docx]

**Online Resource 1 (electronic supplementary material). Electrospinning solution compositions and process parameters.**
Detailed polymer solutions (solvent systems, final concentrations) and Nanospider process settings (electrode distance, voltages, cartridge movement speed, substrate rewinding speed, orifice size, controlled temperature and relative humidity) used to fabricate **PCL** and **PVDF** membranes.
*Note:* Please harmonize the reported **PVDF final concentration** throughout the manuscript (**24 wt% vs 26 wt%**) to a single value consistent with the experimental batch used for in vivo testing.

| **Parameter** | **PCL** | **PVDF** |
| --- | --- | --- |
| Molecular weight | 45.000 | 180.000 |
| Solvent system | Chloroform / ethanol / acetic acid (8/1/1) | Dimethylacetamide / acetone (8/2) |
| Final concentration [wt%] | 16 | 24 |
| Distance between electrodes [mm] | 170 | 170 |
| Voltage [kV] | -10 / +40 | -10 / +50 |
| Cartridge movement speed [mm/s] | 400 | 380 |
| Substrate rewinding speed [mm/min] | 45 | 12 |
| Orifice size [mm] | 0.6 | 0.7 |
| Temperature [°C] | 22 | 22 |
| Relative humidity [%] | 50 | 15 |
